# Supplementary material
Source: Research Square preprint supplement (doi:10.21203/rs.3.rs-9244010/v1)
Supplement: Supplementary file 1 [file 04937c8ea9a464587a3143dc.docx]

# Table 4: Culturally Appropriate Advocacy Quality Standards

| Equitable access: Enhanced accessibility and increased availability. | | |
| --- | --- | --- |
| **Quality standard:** | **Example outputs** | **Example success indicators** |
| 1a) Racially marginalised with increased vulnerability for detention under the MHA have opportunities for advocacy provision. | - Identify and understand pathways to care (e.g. points of contact with services) taken by diverse groups pre-detention in local area - Regular promotion of advocacy offers at locations with people at high risk of detention (e.g. places of safety, CMHT, L&D) - Make advocacy arrangements at the point of MHA assessment where reasonable. - Advocacy organisations have an engagement strategy and action plan specifying their locality specific community approach. This will aim to ensure information about advocacy is routinely provided to diverse carers and community organisations. - Senior advocacy managers will review the engagement strategy and action plan six monthly to ensure aims and targets are being met. - Referral system to advocacy services created with community sector organisations - Outreach to family members to promote referral pathway. | - Increase in availability of advocacy for racially minoritised people with increased vulnerability of MHA detention. - Racially minoritised people who experience disproportionate rates of detention are well represented in advocacy uptake in the community. |
| 1b) People detained are able to see advocates, in person, at the earliest point practicable. Further attempts to engage through the period of detention. | - Opt-out is implemented for all patients. - Advocacy organisations carry out an equality impact assessment of their referral process and engagement model - Advocacy organisations have a minimum weekly presence with sufficient time on the wards to offer support to patients. - Advocates facilitate quarterly awareness raising sessions with mental health professionals in inpatient settings. - Mental health professionals actively promote access to advocacy. - Advocates facilitate access to interpreters for people for whom English is not their first language, or signers for people who are Deaf, where services are not directly provided by people from those communities. - Outreach to family members (e.g. during visiting hours). | - Patients see an advocate within 3 days of detention. - The proportion of referrals brokered by mental health professionals is comparable to the proportionate for each ethnic group on ward. - Regular, 6 monthly, monitoring indicates people using advocacy are satisfied with the time they wait to see an advocate. - Increase in number of requests for interpretation service. |
| 1c) Racially minoritised people receive advocacy support when conditionally discharged from mental health services. | - Engagement work is carried out with mental health professionals to ensure advocates are aware when patients are being conditionally discharged. - Patients are made aware of their right to advocacy support prior to being conditionally discharged. - Engagement work is carried out with CMHT and Mental Health Administrators to ensure patients being or already conditionally discharged are made aware of their right to advocacy support. | - Increase in the number of racially minoritised people receiving advocacy support when conditionally discharged. - The proportion of ethnic groups conditionally discharged is comparable to the proportionate receiving advocacy when on conditional discharge. - Local (patient / discharge) protocol or operational policy prompts mental health professional to inform CAA of conditional discharge |
| **2. Improved Experience – Patient voice and upholding rights** | | |
| **Quality standard** | **Example outputs** | **Example success indicators** |
| 2a) Racially minoritised patients feel their cultural and spiritual needs have been addressed. | - Advocates provide sufficient time to explore the needs of patients. - Advocates have taken action to fulfil AP’s cultural and spiritual needs (e.g. request to see Imam) | - AP’s feel satisfied their experiences of racism and mental health stigma have been validated by the advocate. - AP’s feel satisfied they have had opportunities for meaningful conversation to share their cultural and spiritual needs with advocates. - AP’s feel satisfied their cultural needs have been validated. - AP’s feel satisfied their cultural needs have been sufficiently acted upon. - Systematic collection of AP feedback about their experience of CAA (covering 2a-e). |
| 2b) Racially minoritised people are satisfied they have been supported to self-advocate. | - Advocates support AP’s involvement in spaces to facilitate self-advocacy (e.g. group advocacy, patient groups). - Advocates make APs aware of their rights in relation to Mental Health Act detention (including rights under Equality and Human Rights law). | - APs express they have had opportunities and support to self-advocate. - APs feel satisfied they have been made aware of their rights in relation to Mental Health Act detention (including rights under Equality and Human Rights law). |
| 2c) AP’s feel satisfied advocates have made sufficient efforts to uphold their rights and challenge injustice. | - Advocates have raised AP’s concerns about their rights with mental health professionals. - Advocates have carried out follow ups wherever appropriate to ensure AP’s rights are upheld - Advocates have reported back to AP’s about case progress. - Advocate has asked does the AP have an advance choice document and if so ensure the inpatient staff apply it as far as possible. | - AP’s feel satisfied the advocate has made sufficient efforts to uphold their rights (e.g. freedom from discrimination, experiencing care in the least restrictive way possible). - Increase in number of racially minoritised people supported to make complaint/raise concern. - Number of rights based cases involving racially minoritised people is representative of service demographics. - AP’s feel satisfied that advocates have sufficiently articulated their concerns about the environmental conditions of their detention, their overall physical and mental wellbeing and professional practice. |
| 2d) When a AP consents, and it is appropriate, advocates should work with the AP’s family/next of kin and include/respect their perspectives. | - Advocate explores AP’s wish for family or carer involvement. - Advocates inform AP’s family /nearest relative about their rights and care. | - Racially minoritised APs report greater involvement in their care from family/kin. |
| 2e) Racially marginalised people have increased voice at key decision-making points. | - Patients are clearly offered advocacy at MDT/care plan, and other key, meetings. This offer should be made by advocacy organisations and opt out via NHS staff (e.g repeated opt out for ward rounds, CTM, personalised plans, medication review). | - Racially minoritised people receiving advocacy support at MDT and other key meetings is proportionate for each ethnic minoritised group on ward. - SU’s feel supported a key decision-making meetings. |
| **3. Improved outcomes** | | |
| **Quality standard** | **Example output** | **Example success indicator** |
| 3a) When requested, AP’s should have a choice (e.g. gender, ethnicity, LGBTQ+) of advocate. | - Advocacy organisations use positive action in recruitment - Advocacy organisations develop effective and equitable partnership with appropriate community organisations to enable advocacy needs to be appropriately met. - Advocacy organisations recruit or collaborate with peer advocates to enable advocacy needs to be appropriately met. | - AP’s report they have established safe and trusting relationships with their advocate. |
| 3b) Diverse lived experience informs the strategic direction and operational strategies of the advocacy organisation. | - A strategy is in place for the recruitment and retention of ethnically diverse people with lived experience to be trustees and staff. - The advocacy organisations seeks to facilitate progression from advocacy partner to volunteer and advocate. The strategies implementation is reviewed annually and during any recruitment drive. | - Organisational reports indicate an ethnically diverse profile of people with lived experience in decision-making positions. - Organisation reports indicate ethnically diverse people with lived experience in the staff profile. |
| 3c) A robust system of management and accountability for equality outcomes with a tangible commitment to equality, equity of access and review that provision is culturally relevant. | - Engagement is carried out with patients to develop **patient-defined outputs and outcomes** (e.g. personal growth, changes in treatment plans, improved relationships with care providers, and greater participation in decision-making). - Advocacy organisations should 1) collect quality and complete data, 2) monitor and evaluate data and 3) take appropriate action to address inequities in relation to **patient defined outputs and outcomes**. - Regular reports to the advocacy senior management identify progress in relation to **patients’ defined outcomes**. - Where inequities persist, in relation to **access**, or **patient defined outcomes**, proactive, equity-oriented approaches and practical steps to address these are taken. | - Organisational reports demonstrate engagement with ethnically diverse people with lived experience to develop **patient defined outputs and outcomes** - Organisational reports illustrate efforts to collect accurate and complete ethnic monitoring data and appraisal of this in relation to **patient defined outcomes.** - Organisational reports should identify decisions and actions taken (targeted engagement, focus and intensified awareness raising) in relation to persistent inequities (disproportionate underutilisation or poor experience of CAA). |
| 3d) Advocates are supported to perform culturally sensitive advocacy roles. | - Advocacy organisations ensure advocates receive comprehensive initial and ongoing coaching and training around racial equity. - Training and coaching should be co-produced and informed by and grounded in lived experience. - Historical and contemporary issues relating to power and racial injustice, should be incorporated into staff training. | - All new staff receive initial training around culturally sensitive practice incorporating cultural curiosity and cultural humility. - Ongoing learning opportunities are provided mandatory, at least six monthly. - AP feedback indicates advocates provide culturally sensitive support - Advocacy staff report feeling confident in their ability to provide advocacy to racially minoritised AP’s. |
