# Supplementary material
Source: Research Square preprint supplement (doi:10.21203/rs.3.rs-9244010/v1)
Supplement: Supplementary file 2 [file 2d667a61ea051af510534ebc.docx]

## **Additional file 5: Rapid appraisal final results**

| **Publication details** | **Country** | **Type of advocacy** | **Participants** | **Setting**  **(inpatient, outpatients, community)** | **Study design** | **Results** |
| --- | --- | --- | --- | --- | --- | --- |
| Newbigging K et al, 2015. 'When you haven't got much of a voice': an evaluation of the quality of Independent Mental Health Advocate (IMHA) services in England. Health Soc Care Community. (3):313-24. | UK - England | Mental health advocacy | 75 focus group participants, 214 interviewed | Mainly inpatient | Multi-method approach | Organisational characteristics to deliver best practice: Access to advocacy for those most in need and on CTO; outcome monitoring; focus on empowerment, right and safeguarding; improving wellbeing; recovery; increased confidence and sense of agency. |
| Morrison, P. 2018. Understanding advocacy practice in mental health: a multidimensional scalogram analysis of case records, Journal of Mental Health, 27:2, 127-134 | Australia | Mental health advocacy | 60 case records | Inpatient and community | Case analysis | Advocacy to offer effective communication with professionals, regarding medication, medical records, basic necessities and change of care. |
| Eades, S. 2018. Impact evaluation of an Independent Mental Health Advocacy (IMHA) service in a high secure hospital: a co-produced survey measuring self-reported changes to patient self-determination. Journal Mental Health and Social Inclusion. 22(1) pp. 53-60 | UK - England | IMHA | 115 surveyed | Inpatient | Questionnaire design | Advocacy to increase self-determination (autonomy, competence and relatedness), give people a voice, and increase rights awareness. |
| Gee, A. et al. 2015. What Drives Systemic Mental Health Advocates? Goals, Strategies, and Values of Australian Consumer and Carer Advocacy Organizations. Sage Open, 5(4). https://doi.org/10.1177/2158244015615384 | Australia | Mental health advocacy | 17 organisational documents and 9 participants | Community | Multimethod qualitative: analysis of communication documents + interviews | Advocacy to offer consumer and carer participation, offer voice and recognition, influence and improve mental health services. Good advocacy is collaborative and rights focused. Need for systemic advocacy to promote rights. |
| Davis, T.S., et al. 2011. Measuring Individualized Parent Advocate Services in Children’s Mental Health: A Contextualized Theoretical Application. J Child Fam Stud 20, 669–684. https://doi.org/10.1007/s10826-010-9443-y | US | Parent advocacy | 5 focus groups, 11 interviews | Community and inpatient | Multimethod qualitative: interviews + focus groups | Importance of advocacy workforce development. Mechanism for raising awareness about advocacy. |
| Wisdom JP, et al. 2011. Family Peer Advocates: A Pilot Study of the Content and Process of Service Provision. J Child Fam Stud. 20(6):833-843. doi: 10.1007/s10826-011-9451-6. | US | Mental health advocacy | 5 family peer advocates provided an average of 25 services during each 2-session simulation |  | Walk-through" methodology, where a trained standardised parent simulates seeking services | Peer advocacy to provide emotional support, community networking, rights and social connections. |
| Beaupert, F. 2009. Mental Health Tribunal Processes and Advocacy Arrangements: “Little Wins” are No Small Feat* . Psychiatry, Psychology and Law, 16(1), 90–107. https://doi.org/10.1080/13218710802169339 | Australia | Mental health advocacy (in a legal setting) | 4 participants +, field notes and informal discussions | Mental health tribunals | Multimethod qualitative approach: Interviews and field notes | Advocacy to be consistently available, outcomes focused, well resourced, focused on rights protection, safeguarding, supporting wellbeing, self advocacy and obviating a necessity for lawyers. |
| Hendler R, et al 2016. "We Are Not Really Marketing Mental Health": Mental Health Advocacy in Zimbabwe. PLoS One. 8;11(9):e0161860. doi: 10.1371/journal.pone.0161860. | Zimbabwe | Mental health advocacy | 30 participants | Mostly community/ social justice | Semi-structured interviews | Advocacy providing improved treatment of patients, empower patients and navigate hierarchies. Raise awareness of advocacy in community. |
| Ridley, J.et al. 2018. Mental health advocacy outcomes from service user perspectives. Mental Health Review Journal, 23(4), 280-292. https://doi.org/10.1108/mhrj-10-2017-0049 | UK | Mental health advocacy | 30 patients; 90 “qualifying patients" | Mostly inpatient | Qualitative meta-synthesis: analysis of primary data from three research studies undertaken previously by the authors | Advocacy focused on positive development, changes in treatment, changes in relationships with professionals, improved culturally sensitivity from MH services, increased family involvement and participation. Benefits also included increase voice, self advocacy. Poor evidence of routine outcome monitoring. |
| Newbigging K et al. 2013. Mental health advocacy and African and Caribbean men: good practice principles and organizational models for delivery. Health Expect.16(1):80-104. doi: 10.1111/j.1369-7625.2011.00692.x. | UK | IMHA | 25 African, African Caribbean and dual heritage mental health patients | Inpatient and community | Mixed method: focus groups, a national survey of advocacy practice and qualitative interviews. | Advocacy good practice included: addressing stigma and discrimination; safe relationships; responding to linguistic and cultural needs; gender and ethnicity choice; well trained; cross-referrals to other support. A need for evidence of outcomes, routine monitoring. |
| Rosenman S, et al 2000. Efficacy of continuing advocacy in involuntary treatment. Psychiatr Serv. 51(8):1029-33. doi: 10.1176/appi.ps.51.8.1029. | Australia | Mental health advocacy (evaluating a specific kind of specialised personal advocacy which was different from routine advocacy) | 105 involuntarily hospitalized psychiatric inpatients | Inpatient | Comparative study | Advocacy focused on improving satisfaction with hospital care, reduced rehospitalisation, increased community tenure. |
| Townson, L. 2007. Research project on advocacy and autism. Disability & Society, 22(5), 523–536. doi.org/10.1080/09687590701427669 | England | Mental health advocacy | Doesn't specify | Community | Multimethod qualitative | Advocacy providing pro-active negotiation mechanism |
| Olin SS, et al 2010. Impact of Empowerment Training on the Professional Work of Family Peer Advocates. Child Youth Serv Rev. 1;32(10):1426-1429. doi: 10.1016/j.childyouth.2010.06.012 | US | Family peer advocates | 17 family peer advocates | Inpatient and community | Comparative study- knowledge of advocates before and after training | Advocacy organisations to focus on workforce development (staff competence) |
| Weller P, et al. 2019. The need for independent advocacy for people subject to mental health community treatment orders. Int J Law Psychiatry. 66:101452. doi: 10.1016/j.ijlp.2019.101452. | Australia | IMHA | 76 interview participants, 81 focus group participants, 300 survey respondents | Community | Mixed methods: interviews, focus groups and survey | Advocacy to protect rights, ensure patients are heard. Awareness raising to take place among clinicians. |
| Maylea, C., et al. 2020. Independent Mental Health Advocacy: A Model of Social Work Advocacy? Australian Social Work, 73(3), 334–346. https://doi.org/10.1080/0312407X.2020.1725076 | Australia | IMHA | 467 participants across focus groups, interviews and online survey respondents | Inpatient | Mixed method: interviews, focus groups and online survey | Advocacy supporting rights of patients. A focus needed on systemic advocacy. |
| Foley R et al 2007. Place and provision: mapping mental health advocacy services in London. Soc Sci Med. 64(3):617-32. doi: 10.1016/j.socscimed.2006.09.014 | UK | mental health advocacy | 29 agencies and 12 funders as survey respondentsand 38 focus group participants | All types (mapping range of advocacy services) | Mixed methods: survey and focus groups | Advocacy to focus on equitable access.. |
| Rosales, M. et al. 2018. Identity as a rights advocate: contextualizing the understanding of mental healtassociations in Argentina. Disability & Society, 33(8), 1349–1365. https://doi.org/10.1080/09687599.2018.1488678 | Argentina | mental health rights advocacy | 8 participants who were regular members of the association | Community | Descriptive qualitative based on participatory action research | Advocacy focused on improved social rights. |
| Kleintjes S, et al. 2012. South African mental health care service user views on priorities for supporting recovery: implications for policy and service development. Disabil Rehabil. 34(26):2272-80. doi: 10.3109/09638288.2012.681005. | South Africa | user advocacy (mental health) | 40 interview participants | Both inpatient and outpatient | Semi structured interviews | Advocacy to have a more active role in decision-making to impact recovery , giving a voice and upholding rights. |
| Tideman, M et al. 2015. Young people with intellectual disability—The role of self-advocacy in a transformed Swedish welfare system. International Journal of Qualitative Studies on Health and Well-Being, 10(1). https://doi.org/10.3402/qhw.v10.25100 | Sweden | Disability self advocacy groups | 12 regular members of advocacy group | Community | Qualitative | Advocates to use person centred approach, valuing identity, rights and experience. |
| Drage J. 2012. New Zealand's National Health and Disability Advocacy Service: a successful model of advocacy. Health Hum Rights. 15;14(1):E53-63. | New Zealand | Disability advocacy | One case study (no primary data) | Community | Case study (service has 50 advocates in 25 community based offices) | Advocates demonstrating professionalism, good knowledge, communication and focused on resolution. Advocacy to provide empowerment when advocates are legally mandated and independent. |
| Brolan, C. E. 2012. Health advocacy: a vital step in attaining human rights for adults with intellectual disability. J Intellect Disabil Res. 56(11):1087-97. doi: 10.1111/j.1365-2788.2012.01637.x. | Australia | Intellectual disability advocacy by family members and paid support workers | 113 parents and 84 support workers of adults with intellectual disabilities | Inpatient and community. | Randomised control trial | Key attributes for advocates included being protective, empathetic, loyal, determined, rights-based with good communication skills. |
