# Supplementary material
Source: Research Square preprint supplement (doi:10.21203/rs.3.rs-9244010/v1)
Supplement: Supplementary file 3 [file 36f18647b2cb375779be5f64.docx]

## **Additional file 4: Focus group coding framework**

| **Name** | **Description** |
| --- | --- |
| Advocacy organisational | Advocacy organisational levels factors that serve as facilitators or barriers to the accessibility of advocacy |
| Barriers | Organisational factors that serve as barriers to accessing advocacy - e.g. staff shortages, timing about when advocacy is provided/structural flexibility. How advocacy organisational arrangements allow for consistency & continuity in advocate/client relationship, how relationships are maintained across transitions, boundaries and rocky roads, discharge, community to inpatient etc. |
| Cultural competence of advocacy organisation | Targeted provision, advertising, workforce representation, addressing inequality, investment, organisational policy focus, consideration of cultural competence. Options for choice of advocate, can be around identity & connection, Across all sorts of shared identity/ points of connection. |
| Facilitators | Organisational level facilitators to access and engagement |
| Advocacy relationship (individual) | Strong or weak aspects of the relationship between client and advocate |
| Advocate characteristics | Specific reference to advocate characteristics eg. skills, gender, class etc. |
| Barrier to building positive relationship with advocate | Barriers to building a positive relationship with an advocate  eg. lack of trust |
| Continuity | Continuity of the relationship with an advocate eg. on discharge |
| Culturally responsive or sensitive approaches (individual level) | Culturally responsive or sensitive approaches (individual level) acts by an advocate which demonstrate they have responded to a cultural difference in a competent fashion, supporting racialised people, showing curiosity, validating experience |
| Engagement | Aspects of the context of initial meeting/introduction and that facilitated engagement and/or the ongoing relationship: Gentle, flexible, personalised approach, trust building, listening, info gathering, normalising, validating, non-judgemental, safe space, being informal, trauma informed, awareness and care around triggers, understanding root causes of strong emotions |
| Advocacy role | Expectations of the advocacy role by advocate or service users. Staff understandings are under the MH context |
| Advocates understandings | Advocates understanding of their own role |
| Service user understandings of advocacy | What is understood by the term advocacy and the role of advocates including expectations |
| Carers | Any mention of carers/family members. |
| Commissioning context | How advocacy is being commissioned and the reporting requirements |
| Coproduction/SU involvement | Any reference to the importance of lived experience in advocacy |
| Epistemic injustice (advocate or SU | References to not being heard or understood |
| Experiences of MH support | Service user experiences of mental health support, as an in-patient or in the community |
| Hospitalisation | Experiences of being an inpatient |
| Lack of cultural awareness | A lack of cultural awareness by staff |
| Medication | References to medication, positive or negative |
| Power | Specific references to an imbalance of power between service users and mh staff |
| Mental health context | Aspects of the mental health context that support or hinder the operation of advocates |
| Community organisations | Involvement of community organisations, positive or negative |
| Funding issues | Reference to issues with funding in advocate or other mental health service |
| Independent sector provision | MH services provided by the independent (generally for profit) sector |
| Mental health system | The ecosystem of mental health services, supports and partnerships |
| MH staff and organisations | Mental health organisational structure that supports or hinders advocates- i.e. bad ward culture, bad structural organisation, poor regulation etc |
| MH staff attitudes | MH staff attitudes that support or hinder the operation of culturally appropriate advocates e.g. attitudes towards people with mental health problems |
| Staff expectations of advocacy organisations | MH staff understanding and/or expectations of advocacy eg. to deal with challenging behaviour, to challenge violence |
| Need for training | Any mention of training, something particularly helpful in training, anything missing from existing training, suggestions + or - |
| Advocates and advocacy organisations | Training/ development for advocates and advocacy organisations, something particularly helpful in training, anything missing from existing training, suggestions + or - |
| Community organisations | Training/ development for community organisations, something particularly helpful in training, anything missing from existing training, suggestions + or - |
| MH staff and organisations | Training/ development for MH staff and their organisations, something particularly helpful in training, anything missing from existing training, suggestions + or - |
| Other advocacy | References to other forms of advocacy (i.e. domestic violence advocacy) and/or whether  if unclear it’s mental health advocacy |
| other expectations of advocates |  |
| Outcomes from advocacy | Tangible outcomes attributed to the involvement of an advocate |
| Discharge from section | Reduction in length of stay or discharge from section resulting from advocacy involvement |
| Empowerment and self advocacy | Advocate supporting a client to have a voice, be empowered, relating to encounters with staff around poor relationships (no dignity, inadequate or conflicting information, not listening to patients, wrong communication, rude, disrespectful, poor attitudes, lack of shared decision-making) |
| Empowerment and self-advocacy | Advocate supporting a client to have a voice, be empowered, relating to encounters with staff around poor relationships (no dignity, inadequate or conflicting information, not listening to patients, wrong communication, rude, disrespectful, poor attitudes, lack of shared decision-making) |
| Hope | Service user description that they  felt more hopeful, related to the future after discharge |
| Hope sentiment | service user hope for better future following discharge |
| Improved clinical care | Advocate supporting a client to have a voice, be empowered, relating to clinical matters, including quality (inadequate consideration/examination, substandard care, poor or unsuccessful clinical treatment) or safety (erroneous diagnosis, prescribing difficulties, events threatening patient safety (clinically)). |
| Improved quality of life | Improved quality of life as a result of advocate services |
| Improved relationships with staff | Improvements in the relationships with staff eg. being treated with more dignity and respect, more shared decision-making, being listened to by staff |
| Involvement in care | Greater involvement in decisions about care and treatment eg. more involved in discussions around medication, challenging cultural insensitivity around diagnosis. |
| Involvement of support network | Greater involvement of an individual's support network eg. family, friends, peers, community/faith organisations |
| Management matters improved experience | Advocate supporting a client to have a voice, be empowered, relating to management issues (behaviour of administrative staff, MH nurses, technical and facilities staff) including institutional (problems hospital services supporting patients, poor accomm, hygiene or food, inadequate staffing) and timing (delays, problems in referrals), making sure client receives trauma informed care. |
| Negative | Reference to no tangible outcome or a negative as a result of advocacy |
| Problems measuring outcomes | Issues with how outcomes for advocacy services are measured |
| Support with discharge | Good or poor support with discharge from hospital eg. liaising with benefits/housing organisations and/or referrals to community organisations |
| Upholding rights | Improvement in rights as a result of the advocate taking action in relation to right-based issues (breaching confidentiality, sexual, physical or emotional abuse, discrimination against patients). |
| Political context | Political factors that influenced their admission into the mental health system  eg.immigration issues, housing, cost of living |
| Systemic racism | Reference to systemic racism at any point in the system i.e. disproportionate numbers of BME sectioned, racist policing etc |
| Racial and cultural awareness | Advocates understanding of cultural identity. This can relate to awareness of equality law, racialised stigma, religion, spirituality, help seeking differences, understanding societal inequalities and identity etc |
| Lacking or under developed | Advocate lacks or has a poor understanding of cultural identity/context of the individual eg. awareness of equality law, racialised stigma, religion, spirituality, help seeking differences, understanding societal inequalities and identity etc |
| Well developed | Advocate has a demonstrable understanding of cultural identity/context of the individual eg. awareness of equality law, racialised stigma, religion, spirituality, help seeking differences, understanding societal inequalities and identity etc |
| Rights | Promotion and/or protection of rights |
| Information |  |
| Legal processes | Reference to other legislation or legal processes, which do not involve an advocate |
| Service user understanding of their mental distress | Service description and/or attribution of their mental distress |
| Cultural understanding | Cultural understanding of distress e.g possession |
| Medical understanding | Distress framed in medical terms |
| Societal barriers or facilitators to engagement in advocacy | Social/societal level barriers and facilitators to engagement in advocacy (e.g. countering stigma) |
| Barriers | Social/societal level barriers to engagement in advocacy (e.g. stigma) |
| Facilitators | Social/societal level facilitators to engagement in advocacy (e.g. countering stigma) |
| Support with discharge | Support with discharge from hospital e.g. liaising with benefits/housing organisations and/or referrals to community organisations |
| Good level of support with discharge | Positive support with discharge eg. ensuring continuity of care |
| Lack of support with discharge | Issues with housing, work, benefits, outside support etc evident but advocate does not facilitate access |
