# Supplementary material
Source: Research Square preprint supplement (doi:10.21203/rs.3.rs-9244010/v1)
Supplement: Supplementary file 4 [file 466c7a69e8b563e2e5732c21.docx]

**Table 2 Nominal group session participant breakdown**

| Service user profile | | |
| --- | --- | --- |
| Variable | Label | N = 8 |
| Gender | Male | 1 |
| Female | 7 |
| Ethnicity | Black British | 3 |
| Asian British | 5 |

| Advocate profile | | |
| --- | --- | --- |
| Variable | Label | N = 7 |
| Gender | Male | 3 |
| Female | 4 |
| Ethnicity | Black British | 2 |
| Asian British | 4 |
| White British | 1 |
| Advocacy organisation | National | 1 |
| Regional | 2 |
| Local | 4 |

| Commissioner profile | | |
| --- | --- | --- |
| Variable | Label | N = 2 |
| Gender | Female | 2 |
| Ethnicity | Asian British | 1 |
| White British | 1 |
