# Supplementary material
Source: Research Square preprint supplement (doi:10.21203/rs.3.rs-9244010/v1)
Supplement: Supplementary file 5 [file 75a4c9cb66a995321231c3de.docx]

## **Additional file 6: Pilot site activities**

|  | **Pilot A** | **Pilot B** |
| --- | --- | --- |
| Pilot location | Birmingham and Solihull Mental Health NHS Foundation Trust | Greater Manchester Mental Health NHS Foundation Trust and Pennine Care |
| Inpatient 1-2-1 | Yes | Yes (only for complex cases) |
| Inpatient group advocacy | Yes* | Yes* |
| Opt out | Yes | No |
| Community advocacy | Yes | Yes |
| Community group advocacy | Yes | Yes** |
| Community peer advocacy | Yes | No |
| Carer involvement | Yes | No |
| Focus on PCREF | Yes | Yes |
| Training CAA VCS | No | Yes |
| Forensic | 3 unit | Referral only |
| Pathway to care (at risk) | Community based | Community based |
| Discharge support | Yes (1-2-1 and peer, and community advocacy pre- & post discharge) | Yes (group and 1-2-1 advocacy post discharge) |
| CTO engagement | Yes** | Yes, and CTO opt-out trial** |
| Present IMHA provider | Yes | No |

 *Started but ceased early and before evaluation commenced

** Did not take place
