# Supplementary material
Source: Research Square preprint supplement (doi:10.21203/rs.3.rs-9244010/v1)
Supplement: Supplementary file 6 [file 91e01481b5f477171cfbd52a.docx]

## **Additional file 2: Draft quality standards**

**Draft Quality Standards for Culturally Appropriate Advocacy Provision**

| **QS** | **Equitable uptake: Enhanced accessibility and increased availability.** |
| --- | --- |
| 1a | People at risk of Mental Health Act detention have opportunities for advocacy provision as early as possible (e.g. advocacy promotion in places of safety). |
| 1b | Information about advocacy, and how to access, is routinely provided to ethnically diverse carers and community representatives, with advocacy services fostering relationships with diverse community resources. |
| 1c | People detained are able to see advocates, in person, at the earliest point possible (e.g. within 3 days of detention). Further attempts to engage should be made if a person is too unwell, or initially declines. |
| 1d | Advocacy services take steps to raise mental health professionals’ awareness and understanding of culturally appropriate advocacy. |
| 1e | People detained are clearly offered advocacy at care plan, or other key, meetings. This offer should be made by advocacy organisations. |
| 1f | Advocacy organisations have a minimum weekly presence on wards. |
| 1g | There is easy access to interpreters for people for whom English is not their first language, or signers for people who are deaf, where services are not directly provided by people from those communities. |
| 1h | Appropriate engagement to ensure an advocacy offer for people conditionally discharged. This includes efforts to establish contact prior to the client being conditionally discharged. |
| 1j | Where inequalities in uptake persist, proactive, equity-oriented approaches and practical steps to address these are taken. |
|  |  |
| **QS** | **Improving Experience – Patient voice and upholding rights** |
| 2a | People detained feel satisfied they have had opportunities for meaningful conversation to share their cultural needs with advocates. This includes a feeling that any experiences of racism and mental health stigma have been validated. |
| 2b | People detained feel satisfied advocates have taken sufficient steps to ensure their cultural and spiritual needs have been fulfilled (e.g. request for visit to Imam) |
| 2c | Where advocacy is not provided by a community organisation that works with racialised minorities, an effective and equitable partnership with appropriate community organisations is in place to enable advocacy needs to be appropriately met. |
| 2d | People detained express they have had opportunities and support for improved self-determination and self-advocacy (e.g. group advocacy, service user groups, involvement in developing advance choice documents). |
| 2e | People detained feel satisfied they have been made aware of their rights in relation to Mental Health Act detention (including rights under Equality and Human Rights law). |
| 2f | People detained feel satisfied that advocates have made sufficient efforts to uphold their rights (e.g. experiencing care to be least restrictive possible). |
| 2g | Patients feel satisfied advocates have sufficiently supported their voice in relation to concerns about injustice(s) and/or in making a complaint (e.g. concerns about patient records). |
| 2h | Where requested and appropriate, advocates should work with the patient’s family and include/respect their perspectives. |
| 2i | Patients feel satisfied that advocates have sufficiently considered and articulated their concerns about the environmental conditions of their detention and their overall physical and mental wellbeing. |
| 2j | People detained feel satisfied that the advocate has demonstrated persistence in dealing with their case. |
|  |  |
| **QS** | **Organisational Standards: a tangible commitment to equality, equity of access and providing a culturally relevant approach.** |
| 3a | Wherever possible, people detained have a choice (e.g. gender, ethnicity) of advocate, unless otherwise requested. |
| 3b | The service supports lived experience by empowering ethnically diverse people to have a stake in the running of the organisation (e.g. as trustees) and facilitates progression from advocacy partner to volunteer and advocate. |
| 3c | There is a robust system of management and accountability for equality outcomes, with regular reports to the senior management team. |
| 3d | User-defined success: Outcomes reflect the goals defined by the service users themselves, such as personal growth, changes in treatment plans, improved relationships with care providers, and greater participation in decision-making. |
| 3e | Measurable outcomes: Advocacy services should aim to improve tangible outcomes for clients, notably reductions in disproportionate rates of detention, lengths of stay etc. reductions in physical, sexual, and emotional abuse, improvements in mental health (e.g., reduction in depression), quality of life, and reduced mortality. |
| 3f | Advocacy services undertake a regular evaluation of monitoring data. This is not limited to determining equitable uptake. Scope to understand any ethnic differences in experience, including user-defined and other measurable outcomes, should be a part of regular service improvement considerations. |
| 3g | Where inequalities in experience persist, proactive, equity-oriented approaches and practical steps to address these are taken. |
| 3h | Training and supervision: Advocates receive comprehensive initial and ongoing training to ensure they are equipped with the necessary knowledge and skills. Regular supervision and support are provided to maintain high standards of practice. This includes training in issues around racial injustice, and approaches to providing culturally sensitive advocacy. |
