# Supplementary material
Source: Research Square preprint supplement (doi:10.21203/rs.3.rs-9244010/v1)
Supplement: Supplementary file 7 [file 9a0e84de6212375cf2af039b.docx]

# Table 7 Improved outcomes

| 3a) When requested, AP’s should have a choice (e.g. gender, ethnicity, LGBTQ+) of advocate. |
| --- |
| Example output  - Advocacy organisations develop effective and equitable partnership with appropriate community organisations to enable advocacy needs to be appropriately met. |
| Example indicator  - Advocacy partners report they have established safe and trusting relationships with their advocate. |
| Evidence from RAServices developed by the Black Community and voluntary sector are grounded in different conceptualizations of advocacy and sharper understanding of the needs of African and Caribbean men (Newbigging et al, 2013). |
| Evidence from FG  - SU: *If you're going to create an advocacy service, could it essentially be a partnership with community groups that really know those communities or give contracts to those community groups and actually develop advocacy training so you can train up the community groups to do their own advocacy?* |
| Evidence from CCS  - AP: *He [advocate] said he helps ethnic minority backgrounds and that resonated with me and I didn't want to really be in the hospital. It felt like he's just helping me. So that's why I turned to him.* - *AP: It was definitely that it was more focused on the black community. So that was something that was quite stand out for myself.* |

| 3b) Diverse lived experience informs the strategic direction and operational strategies of the advocacy organisation. |
| --- |
| Example output  - A strategy is in place for the recruitment and retention of ethnically diverse people with lived experience to be trustees and staff. |
| Example indicator  - Organisational reports indicate an ethnically diverse profile of people with lived experience in decision-making positions. |
| Evidence from RA  - Lived experience not involved in framing advocacy outcomes or measurements (Ridley et al, 2018). |
| Evidence from FG  - SU: *Employing ex-service users and ethnic minorities, or somebody who counts as both would really help.* |
| Evidence from CCS  - Advocate: *It can be genuine lived experience kind of advocates where they're paid well.* |

| 3c) A robust system of management and accountability for equality outcomes with a tangible commitment to equality, equity of access and providing a culturally relevant approach. |
| --- |
| Example output  - Engagement is carried out to develop patient-defined outputs and outcomes. |
| Example indicator  - Organisational reports demonstrate engagement with ethnically diverse people with lived experience to develop patient defined outputs and outcomes. |
| Evidence from RA  - Lack of routine outcome reporting, making impact measurement inconsistent (Newbigging et al, 2015, Ridley et al 2018). |
| Evidence from FG  - SU: *There's no prevention you need to be out on the street before people can actually help you.* |
| Evidence from CCS  - AP: *It'd be nice if the advocacy service advertise a bit more. I feel the pilot could be doing a bit better, could be actively going up to patients a bit more. I had to go up to the advocate and find out what it was.* |

| 3d) Advocates are supported to perform culturally sensitive advocacy roles. |
| --- |
| Example output  - Advocacy organisations ensure advocates receive comprehensive initial and ongoing coaching and training around racial equity. |
| Example indicator  - AP feedback indicates advocates provide culturally sensitive support. |
| Evidence from RA  - Appropriate and ongoing workforce development should be a requirement to ensure essential value, knowledge and skills of advocates (Newbigging et al, 2015). |
| Evidence from FG  - SU: *When I was trying to explain some stuff to my advocate I don't think he fully understood. There was a conversation about Islam and how we pray, he said, "oh, would you guys pray out loud?" It's like, you don't understand it. It's like sometimes you do, sometimes you don't. But only the brothers will know that.”* |
| Evidence from CCS  - Advocate: *I could see people feeling more comfortable sharing because our service is specifically for cultural advocacy. Because we all like work under a culturally competent lens and we're very aware of these things. It means we're more likely to kind of dig deeper. So say if the ward do say, ‘yeah, they speak English, they're fine’. We're not going to bat it off. We're going to check with the person.* |
