# Supplementary material
Source: Research Square preprint supplement (doi:10.21203/rs.3.rs-9244010/v1)
Supplement: Supplementary file 8 [file 9bed7337e4798041914c088c.docx]

**Table 1 Focus group service patient, advocate and commissioner demographics**

| Variable | Label | N = 28 |
| --- | --- | --- |
| Ethnicity | Black British, African, Caribbean | 12 |
| Asian | 6 |
| Mixed Black and White | 4 |
| Other | 3 |
| White other | 1 |
| Not specified | 2 |
| Gender | Male | 15 |
| Female | 13 |

| Advocate profile | | |
| --- | --- | --- |
| Variable | Label | N = 9 |
| Gender | Male | 4 |
| Female | 5 |
| Ethnicity | Black British | 2 |
| Asian British | 4 |
| White British | 1 |
| Not provided | 2 |
| Advocacy organisation | National | 3 |
| Regional | 2 |
| Local | 4 |

| Commissioner profile | | |
| --- | --- | --- |
| Variable | Label | N = 4 |
| Gender | Female | 3 |
| Male | 1 |
| Ethnicity | Asian British | 1 |
| White British | 3 |
