# Supplementary material
Source: Research Square preprint supplement (doi:10.21203/rs.3.rs-9244010/v1)
Supplement: Supplementary file 9 [file a03ceda90854c080e67463f9.docx]

**Table 3 Advocacy partner interview demographics**

| **Variable** | **Label** | **n** | **Pilot A** | **Pilot B** |
| --- | --- | --- | --- | --- |
| **Ethnicity** | Black British other | 7 | 6 | 1 |
| Black African | 6 | 4 | 2 |
| Black Caribbean | 5 |  | 5 |
| Asian (Asian British) | 1 |  | 1 |
| Asian Pakistani | 3 | 1 | 2 |
| Asian British Bangladeshi | 1 |  | 1 |
| Mixed White Asian | 1 |  | 1 |
| Mixed/multiple ethnic group | 1 |  | 1 |
| Other ethnic - Arabic | 1 |  | 1 |
| White British | 1 |  | 1 |
| **Gender** | Female | 10 | 7 | 4 |
| Male | 15 | 4 | 11 |
| Declined to answer | 1 |  | 1 |
| **Sexuality** | Heterosexual | 19 | 8 | 9 |
| Gay | 1 |  | 1 |
| Bisexual | 2 | 2 | 2 |
| Declined to answer | 4 | 1 | 4 |
| **Religion** | Christian | 9 | 5 | 5 |
| Muslim | 9 | 3 | 7 |
| Rastafarian | 1 |  | 2 |
| Any other religion not specified | 4 |  |  |
| No religion | 2 | 2 |  |
| Declined to answer | 2 | 1 | 2 |
