# Supplementary material
Source: Research Square preprint supplement (doi:10.21203/rs.3.rs-9244010/v1)
Supplement: Supplementary file 10 [file a9d3becd71694adb90c0c81c.docx]

# Table 6 Improved Experience: Inpatient voice and upholding rights.

| 2a) Racially minoritised patients feel their cultural and spiritual needs have been addressed. |
| --- |
| Example outputAdvocates provide sufficient time to explore the needs of APs. |
| Example indicator  - APs feel satisfied they have had opportunities for meaningful conversation to share their cultural and spiritual needs with advocates. |
| Evidence from RA  - APs receiving advocacy reported increased satisfaction of needs being met (Eades, 2018, Rosenman et al, 2000) - Advocacy associated with better access to support and changes in health and social care services (Ridley et al, 2018). |
| Evidence from FG:  - SU: *In terms of advocacy, especially for racially minoritised groups, is having that acknowledgement of discrimination and being reminded that is not just and that is not something that we should tolerate.* |
| Evidence from CCS  - AP: *I felt like they understood, especially as there's a lot of people of colour that work there. They understood the plight and the situation and obviously even the people that weren't of colour, the white people that were there, they really conveyed their understanding and empathy towards the situation as well.* |

| 2b) Racially minoritised people are satisfied they have been supported to self-advocate. |
| --- |
| Example output  - Advocates support AP’s involvement in places of self-advocacy (e.g. group advocacy, patient groups). |
| Example indicatorPeople detained express they have had opportunities and support to self-advocate. |
| Example evidence from RA  - Advocacy increases AP’s understanding of rights and treatment, and empowered them to exercise rights, have a voice and increase confidence (Newbigging et al, 2015, Eades, 2018, Fontaine and Allard (1997). - Following advocacy support in a high secure inpatient unit, 70% of AP’s reported increased self-determination (Eades, 2018). |
| Evidence from FG:  - Prof: *There is a process where information about rights is shared, people can help themselves that way.* |
| Evidence from CCS:  - AP: *He told me to be more open with the doctor, my next ward run after that I felt a lot more empowered, and I didn't feel that power imbalance as much.* |

| 2c) Patients feel satisfied advocates have made sufficient efforts to uphold their rights and challenge injustice. |
| --- |
| Example output  - Advocates have raised AP concerns about their rights with mental health professionals. |
| Example indicator  - AP’s feel satisfied the advocate has made sufficient efforts to uphold their rights (e.g. freedom from discrimination, experiencing care in the least restrictive way possible). |
| Evidence from RA  - Advocates safeguard rights, support legal processes, contest community treatment orders, medication risks, challenging sections, side effects and complaints and others (Gee et al, 2015, Stomski et al, 2017, Simpson et al 2021). |
| Evidence from FG:  - SU: *Being in a space where you can give staff the opportunity to express cultural humility and understanding. If you are a White clinician and you're trying to relate to or assess a young Black man who has negative experiences with White clinicians, that might impact the outcome that you have from that assessment.* |
| Evidence from CCS:  - AP: *They were giving me injection and tablets at the same time. I got a side effect. The advocate told them that I can't take the tablets and the injection together. They stop the injections and the tablets.* |

| 2d) When an AP consents, and it is appropriate, advocates should work with the AP’s family/next of kin and include/respect their perspectives. |
| --- |
| Example output  - Advocate explores with the AP their wishes for family involvement in their care. |
| Example indicator  - Racially minoritised AP’s report greater involvement in their care from family/kin. |
| Evidence from RA  - Advocacy associated with better access to support and changes in health and social care services (Ridley et al, 2018), and APs value having someone working on their side (Drange, 2012). |
| Evidence from FGSU: It isn't just dropping some leaflets off on the ward. Advocates need to try and be around when relatives or supporters or friends are on a ward visit or even just ask a patient, ‘can you give us the details of somebody who speaks for you, who's your sort of prime supporter so that we can tell them that these services are available to you’ |
| Evidence from CCSAP: I got my sisters and my brothers, and the advocate, coming to the ward round. |

| 2e) Racially marginalised people have increased voice at key decision-making points. |
| --- |
| Example output  - SU’s are clearly offered advocacy at key meetings, an made by advocates and opt out via NHS staff (e.g repeated opt out for ward rounds, CTM, personalised plans, medication review). |
| Example indicator  - AP’s feel supported a key decision-making meetings. |
| Evidence from RA  - Effective communication and patient involvement in decision-making are crucial for patient satisfaction (Emrich et al, 2014). - Involvement in ward rounds is important to influence decisions (Newbigging et al, 2015). |
| Evidence from FG  - SU: *There is a different power balance in the room when there's an advocate just sitting there, it doesn't make a difference whether the advocate says anything, but it might give somebody confidence to say something themselves, and it also puts the staff on a back foot a little bit.* |
| Evidence from CCS  - Prof: *That's the piece that's missing...did they result in kind of changes in care planning? Was there increased visibility in MDTs of service user voice? Eights issues around care and treatment, medical kind of concerns or MDT* - AP: *I need someone who can speak on behalf of me, so she was there for me.* |
