# Supplementary material
Source: Research Square preprint supplement (doi:10.21203/rs.3.rs-9244010/v1)
Supplement: Supplementary file 11 [file b4139eb4bd30f75dd0505286.docx]

## **Additional file 3: Advocacy partner topic guide**

1. Can you let me know why you decided to access pilot A/B advocacy?
   1. Have you accessed advocacy previously (if so, what for)?
   2. What has been your experience of accessing mental health services?
2. How did you find your experience attending pilot A/B?
   1. How did you find out about the service? Was the way the service was offered appropriate?
   2. Was the time you waited to see an advocate satisfactory
   3. How many sessions did you attend?
   4. Did you attend group advocacy, if so what was your experience?
   5. Did you feel that you had an opportunity to raise issues that have affected you?
   6. What types of issues did you raise?
   7. Do you feel you have had the opportunity to raise these issues previously?
   8. Were there issues that you would have liked to raise but didn’t?
   9. Did the advocate ask if you would like your family members/next of kin to be involved in the issues you raised?
   10. Would you recommend attending advocacy to other inpatients/MH service users?
   11. Do you feel group advocacy provides an opportunity for self or peer advocacy?
3. Has anything made receiving advocacy support more positive?
   1. What do you feel makes a good advocacy service? (would you prefer a choice of advocate? Has CAA made a difference compared with previous admissions)
   2. Has the length of time with the advocate been sufficient?
   3. Did the advocate take sufficient time to understand your cultural needs?
   4. Did you raise any concerns about the provision of care or treatment
   5. Were you given feedback on the outcome of your concern?
   6. Did advocacy meet your expectations (did it meet your best interests)?
   7. Did the advocate offer to provide support at important meetings (e.g. MDT, care plan meetings, decisions about leave, medication reviews, tribunal matters)? (would you liked to have this offered?)
   8. What skills do you feel would help advocates to deliver advocacy more effectively (e.g. conflict management, negotiation, persistence)?
   9. What knowledge do you feel would help advocates to deliver advocacy more effectively (e.g. medical insights, cultural insights, legislative knowledge)?
4. Has anything made your experience of receiving advocacy feel less good?
   1. Were you able to engage with your advocacy worker? Are there any reasons that you feel people will not use advocacy?
   2. How did you experience the discharge process?
   3. Would you know what to do if you had a complaint about pilot A/B?
5. What are your thoughts on pilot A/B’s role in sticking up for your rights?
   1. Can you share any examples of rights protection (e.g. right to leave, freedom from coercion)?
   2. Can you share any examples of rights promotion (e.g. health and wellbeing, promoting (social) inclusion)?
6. Do you feel you are more aware of your rights since engaging with advocacy support (does it help you to now understand discrimination? Do you feel a greater sense of empowerment now?
7. Do you feel Black, Asian and minority ethnic people in mental health services have different needs when it comes to advocacy? What are some of those needs? If yes, have the pilots addressed these needs?
8. What differences are you aware pilot A/B ‘sadvocacy has made for Black Asian and minority ethnic people? (raising concerns about the provision of care and treatment, seeing change)
9. How could we make advocacy support better for yourself and others?  (e.g. preferred choice of receiving advocacy (e.g. in person, phone, online) diverse workforce, staff visibility/engagement approach (e.g. ward visiting, information flyers), What is your preferred choice of receiving advocacy support?  (group, peer, self – advocacy)
