# Supplementary material
Source: Research Square preprint supplement (doi:10.21203/rs.3.rs-9244010/v1)
Supplement: Supplementary file 12 [file ccaefcc2316e893998d271dc.docx]

# Table 5 Equitable access: Enhanced accessibility and increased availability.

| QS 1a: Racially minoritised people at risk of Mental Health Act detention have opportunities for advocacy provision. |
| --- |
| Example output  - Regular, advocacy promotion at locations with people at high risk of detention (e.g. places of safety, CMHT, Liaison and diversion). |
| Example indicator  - An increase in advocacy provided to diverse racially minoritised people at risk of detention. |
| Evidence from RA  - A lack of proactive community outreach for high-need individuals (Newbigging et al., 2015; Weller et al., 2019). - Advocacy services for specific groups, such as racialized communities, are often underfunded, financially unstable and stretched beyond their capacity, making them fragile and unable to meet demand (Newbigging et al., 2013; Foley, 2006; Newbigging & McKeown, 2007). - Evidence that groups who are often hardest to contact and would benefit the most from advocacy are frequently overlooked, exacerbating existing disadvantages (Newbigging et al., 2015; Weller et al 2019) . - Disparities in community mental health advocacy services (Foley 2006). |
| Evidence from FG  - Carer: *“When are people accessing an advocate? When are they getting a referral? How easy is that?”* - SU: *I'm specifically interested in early intervention advocacy because I believe that a lot of energy should be placed in early intervention because we seem so far that a lot of the advocacy that is actually available is when people have entered into crisis and relapse or been sectioned.* |
| Evidence from CCS  - AP: *They have supported the issues and things that have been going on with myself, they have contacted other agencies on my behalf to help forward my concerns. It feels like they have been trying to fight in my corner to support me. They've contacted my landlord. They spoke to the police to try and reach some resolutions.* - Advocate: *This service user who was feeling suicidal and said, “i'm not going into this house, I might as well just die”. She went into the street. The nurses said, “We’ve discharged you, it’s not our business!” This service user knows the name of the nurse who discharged her and didn’t care when she was heading into oncoming traffic. We made a complaint to the NHS Mental Health Trust.* - Prof: *So I had a lady who was currently put on into temporary accommodation. Her children were living with her, she suffered from domestic violence. She was in a very difficult position, mentally. Housing wasn't helping, and she just felt herself every door she knocked on, she was just getting another one slammed in her face. The peer advocate did help out.* - Practice: A referral system was created with community organisations increasing access to advocacy for racially minoritised people |

| QS 1b) All inpatients can see advocates, in person, at the earliest point practicable. Further attempts to engage should be made if a person is too unwell, or initially declines. |
| --- |
| Example output  - Advocacy organisations have a minimum weekly presence with sufficient time on the wards to offer support to patients. |
| Example indicator  - The proportion of referrals brokered by mental health professionals is comparable to that for ethnic groups across mental health sites and wards. |
| Evidence from RA  - Mainstream mental health advocacy services are not adequately meeting the diverse needs of racially minoritised people in the UK, are often not culturally appropriate, undermining accessibility for racialised patients who already face racism and distrust in the system (Newbigging et al 2015, Newbigging et al 2013) |
| Evidence from FG  - Advocate: *My team, we're having a lot of trouble getting interpreters, not just us, but the NHS board staff getting interpreters, finding someone for a certain date or ward round.* - Advocate: *The implementation of opt out will help us make sure that we see or offer the service to everybody, especially those who may be hard to reach on the wards because they confine find themselves to their rooms or you know they're less likely to request an advocate.* |
| Evidence from CCS  - Advocate: *I introduced myself three separate times throughout her [AP] admission. I believe the continued ward presence and attempts to engage with her made her more comfortable to reach out for support.* - AP: *The last time when she came out, she said, if you need help with anything give us a ring. Then about the medication, I gave them a ring and I said, would you be able to come out and speak to the doctor? And she came out straight away.* |

| QS 1c) Racially minoritised people receive advocacy support when conditionally discharged from mental health services. |
| --- |
| Example output  - Engagement work is carried out with mental health professionals to ensure advocates are aware when patients are being conditionally discharged. |
| Example indicator  - Increase in the number of racially minoritised people receiving advocacy support when conditionally discharged. |
| Evidence from RA  - Lower uptake of advocacy among patients conditionally discharged (Newbigging et al 2015;  Weller et al 2019) - APs receiving independent advocacy showed lower re-hospitalisation rates (Rosenman et al, 2000). |
| Evidence from FG  - Carer: *My experience recently, someone got discharged* *from hospital and there was no**communication. Not from the hospital. No appointment was booked or any contact made for up to four months. Had I not been supporting this person and caring for this person, just imagine if this person was living alone.* |
