# Supplementary material
Source: Research Square preprint supplement (doi:10.21203/rs.3.rs-9244010/v1)
Supplement: Supplementary file 13 [file cf5158532a726c4226c8781f.docx]

## **Additional file 1: Focus group topic guide**

General welcomes

Introductions,

Explaining process (incl agreeing ground rules),

IT functionality

Introduce research.

Background to the research

1. What do you feel are the main issues for racially minoritised people in advocacy support you provide? Do you feel racially minoritised people have different needs when it comes to advocacy?
2. How effective do you feel advocacy has been at promoting positive outcomes for racially minoritised people?
3. How effective has advocacy been at protecting and promoting rights of people from racialised communities?
4. Have you any recommendations for how advocacy support could be more helpful for people from racialised communities?
5. If you had a blank canvass, what would be the ideal service delivery model? Being able to spend more time on wards?
6. Are there any costs associated with advocacy that you had to pay out-of-pocket?
7. Advocacy and commissioner specific:
8. What are some challenges of providing advocacy support for racially minoritised communities?
